# Supplementary material for: One pot synthesis of acridine analogues from 1,2-diols as key reagents
Source: Royal Society of Chemistry journal article supplement (doi:10.1039/c5ra19595k), 2015-01-01

## One pot synthesis of acridine analogues from 1,2-diols as key reagents.

Narasashetty Jagadishbabu and Kalegowda Shivashankar\*

P.G. Department of Chemistry, Central College Campus, Bangalore University, Bangalore - 560 001, Karnataka, India.

\*Corresponding author. Tel: +91-80-22961249, *E-mail addresses:*

*shivashankark@gmail.com* (K. Shivashankar)

| Entry | Compounds | Spectra           |
|-------|-----------|-------------------|
| S2    | 4a        | <sup>1</sup> H    |
| S3    | 4a        | <sup>13</sup> C   |
| S4    | 4b        | <sup>1</sup> H    |
| S5    | 4b        | <sup>13</sup> C   |
| S6    | 4c        | <sup>1</sup> H    |
| S7    | 4c        | <sup>13</sup> C   |
| S8    | 4d        | <sup>1</sup> H    |
| S9    | 4d        | <sup>13</sup> C   |
| S10   | 4d        | ESI mass spectrum |
| S11   | 4e        | <sup>1</sup> H    |
| S12   | 4e        | <sup>13</sup> C   |
| S13   | 4f        | <sup>1</sup> H    |
| S14   | 4f        | <sup>13</sup> C   |
| S15   | 4g        | <sup>1</sup> H    |
| S16   | 4g        | <sup>13</sup> C   |
| S17   | 4h        | <sup>1</sup> H    |
| S18   | 4h        | <sup>13</sup> C   |
| S19   | 4i        | <sup>1</sup> H    |
| S20   | 4i        | <sup>13</sup> C   |
| S21   | 4j        | <sup>1</sup> H    |
| S22   | 4j        | <sup>13</sup> C   |
| S23   | 4k        | <sup>1</sup> H    |
| S24   | 4k        | <sup>13</sup> C   |
| S25   | 4l        | <sup>1</sup> H    |
| S26   | 4l        | <sup>13</sup> C   |
| S27   | 4m        | <sup>1</sup> H    |
| S28   | 4m        | <sup>13</sup> C   |
| S29   | 4n        | <sup>1</sup> H    |
| S30   | 4n        | <sup>13</sup> C   |
| S31   | 4o        | <sup>1</sup> H    |
| S32   | 4o        | <sup>13</sup> C   |

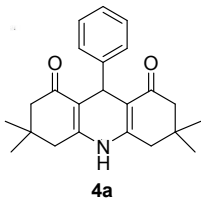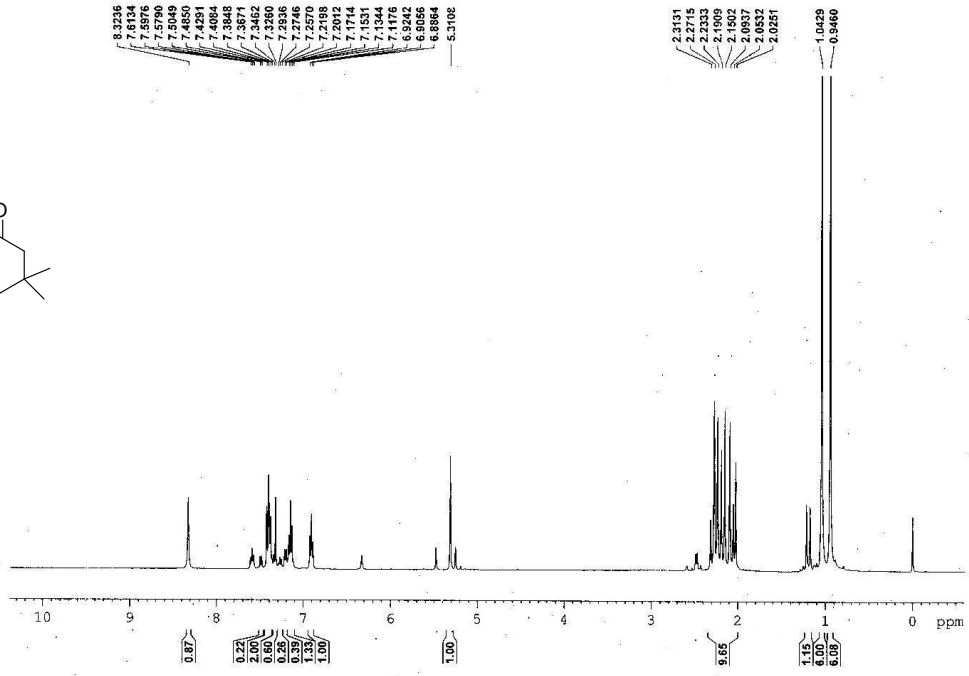

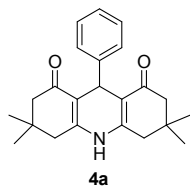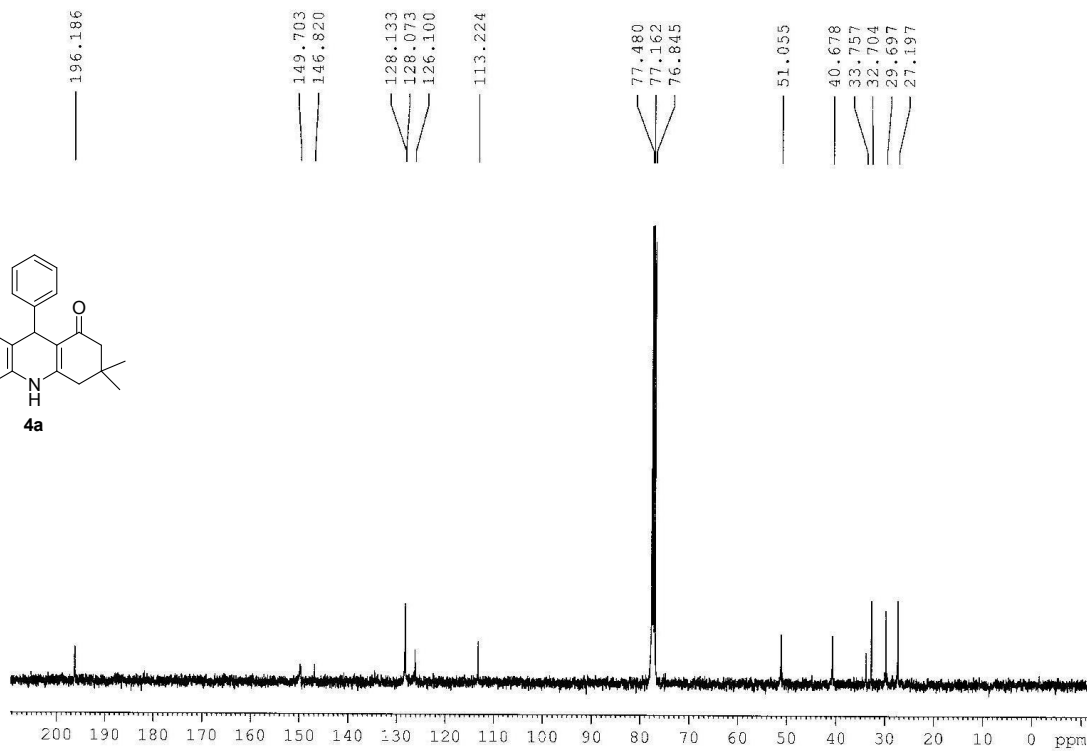

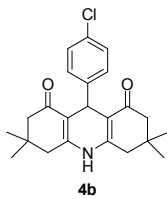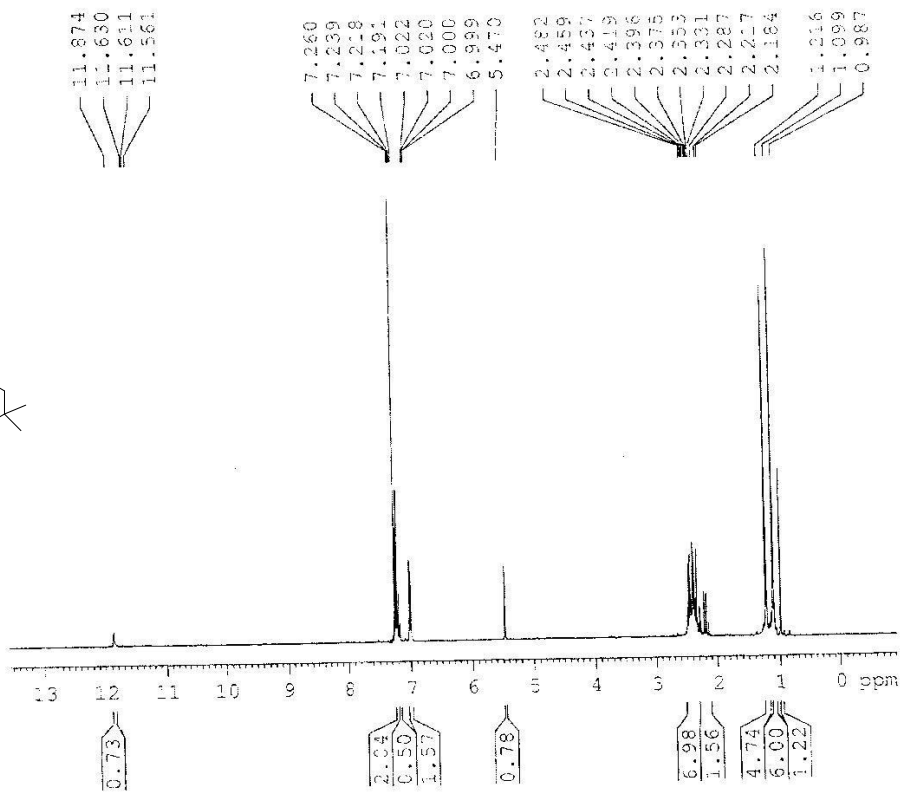

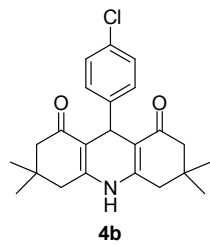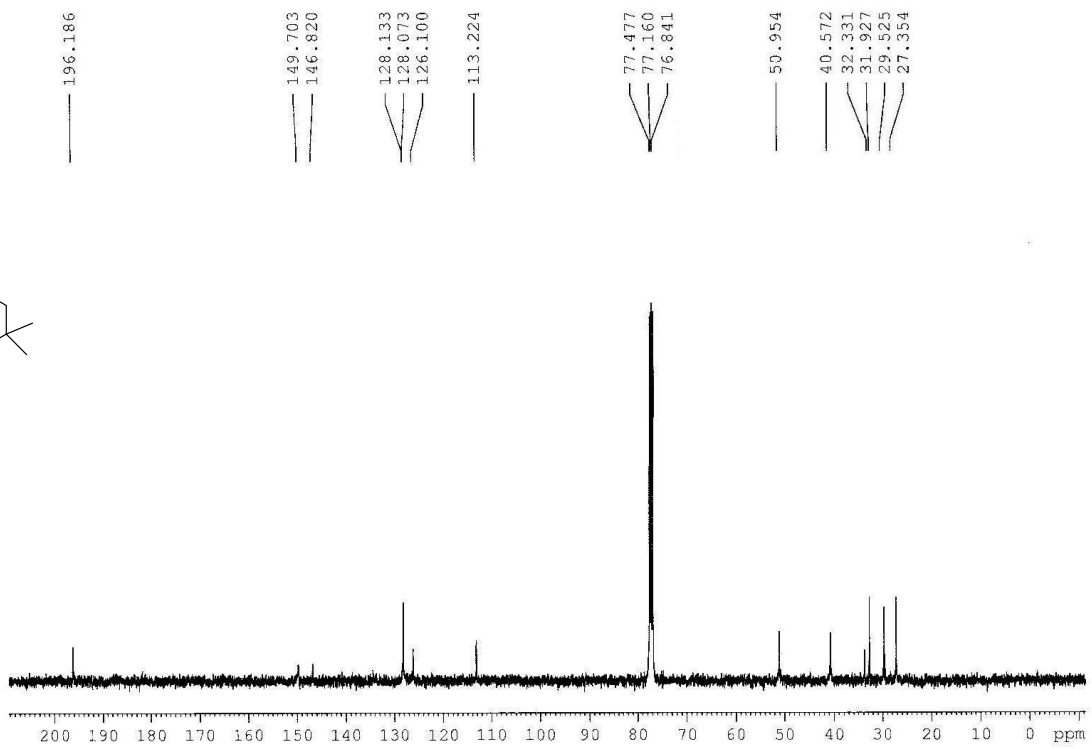

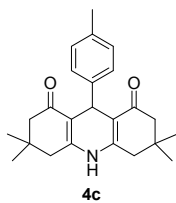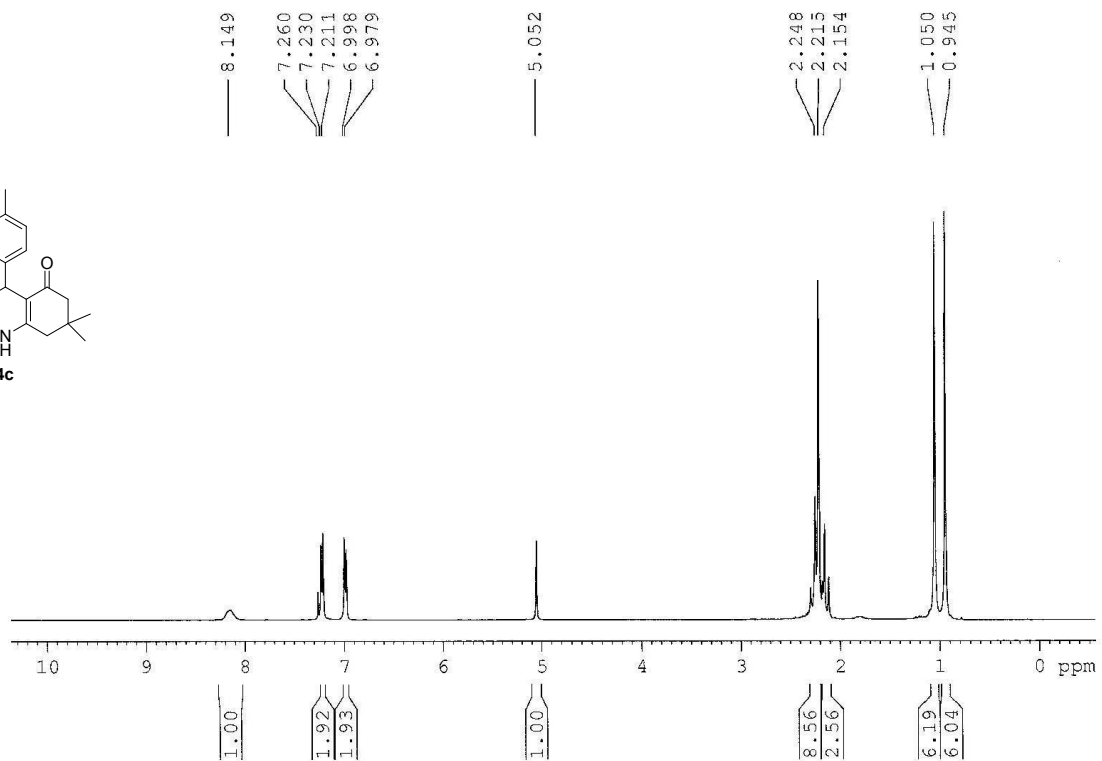

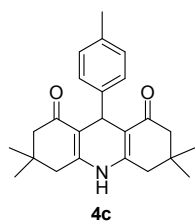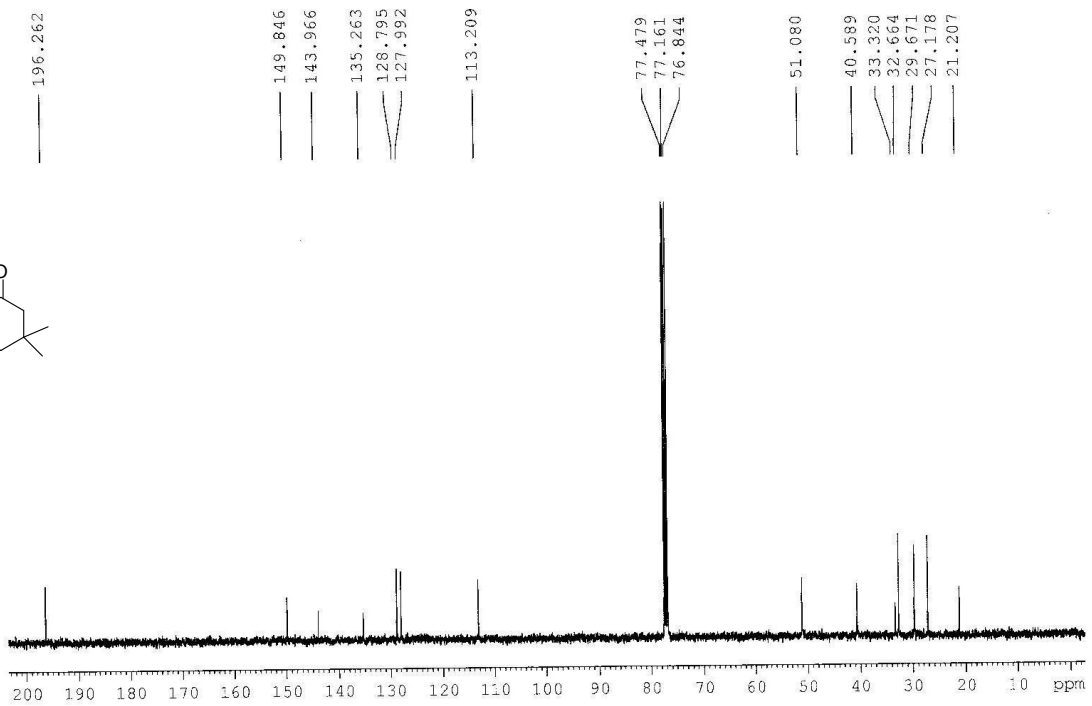

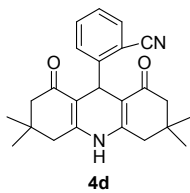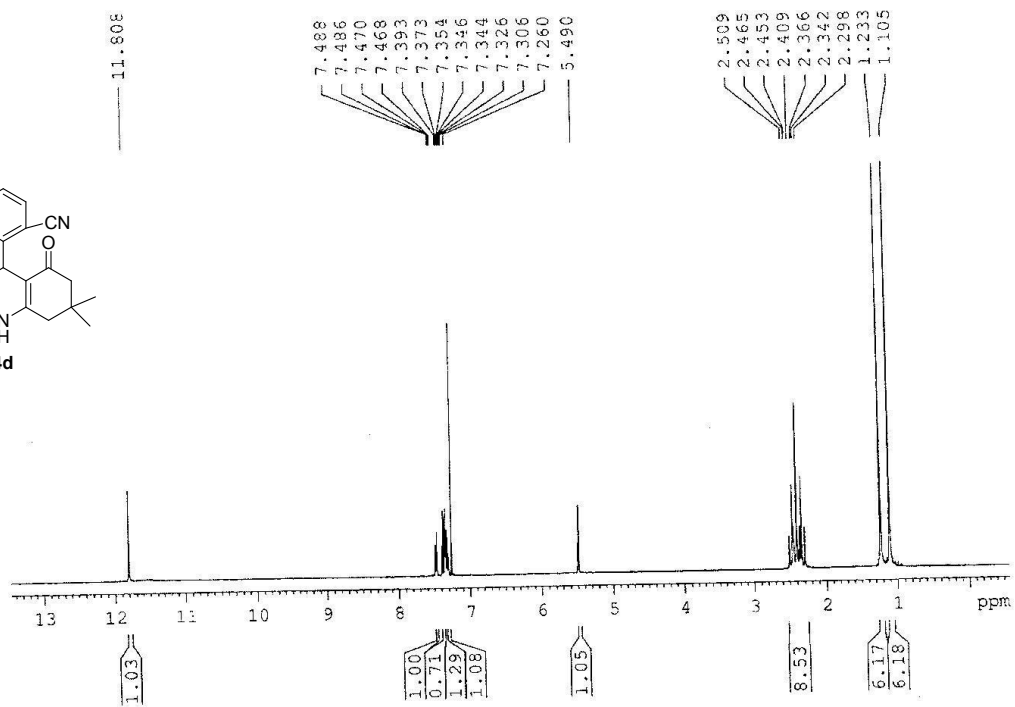



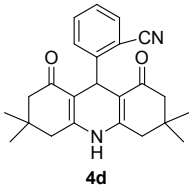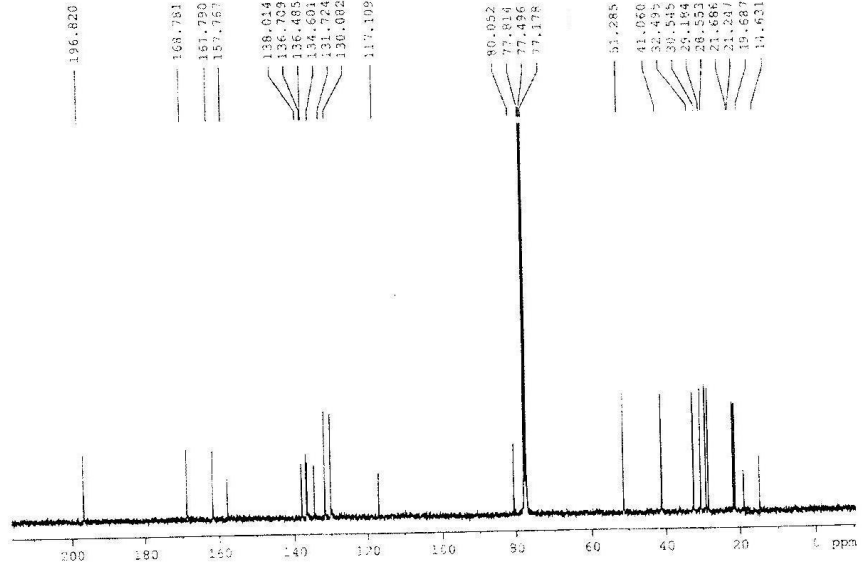

ESI-MS

+MS, 0.7-0.8min #(139-156)

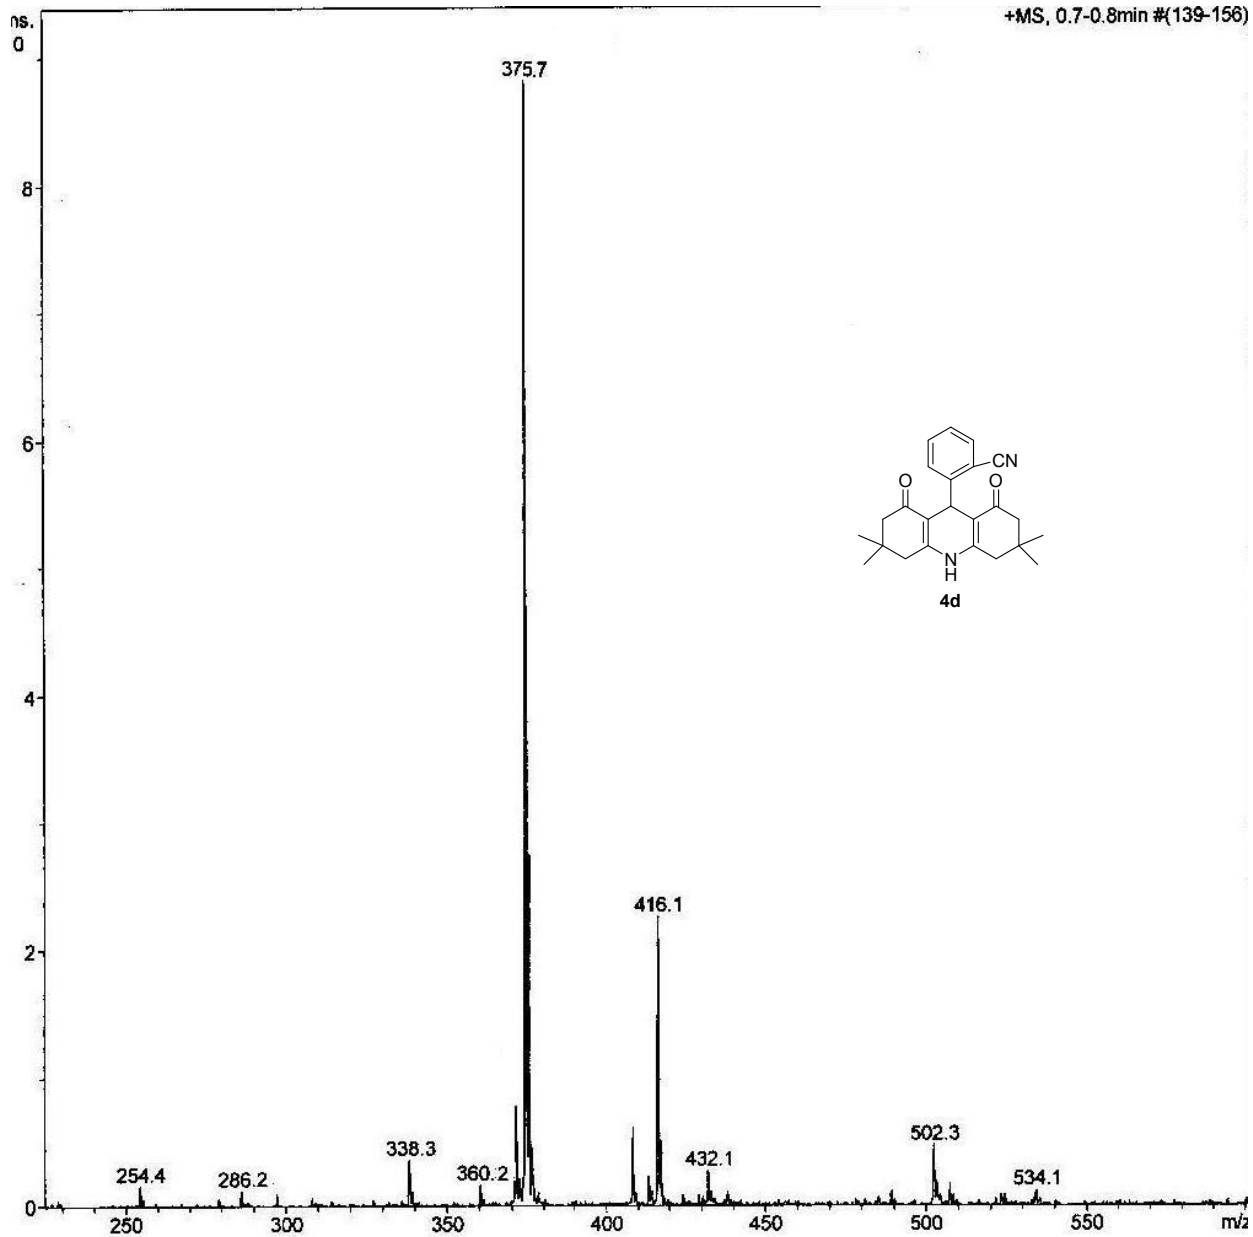

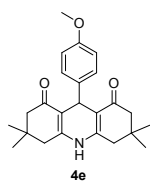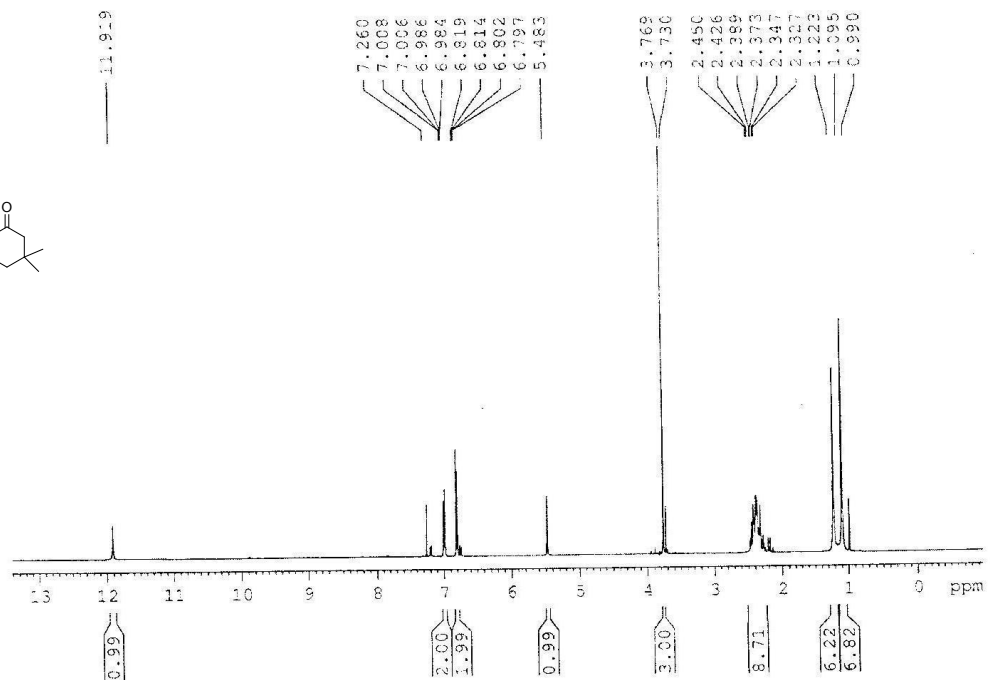

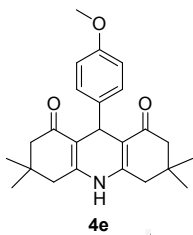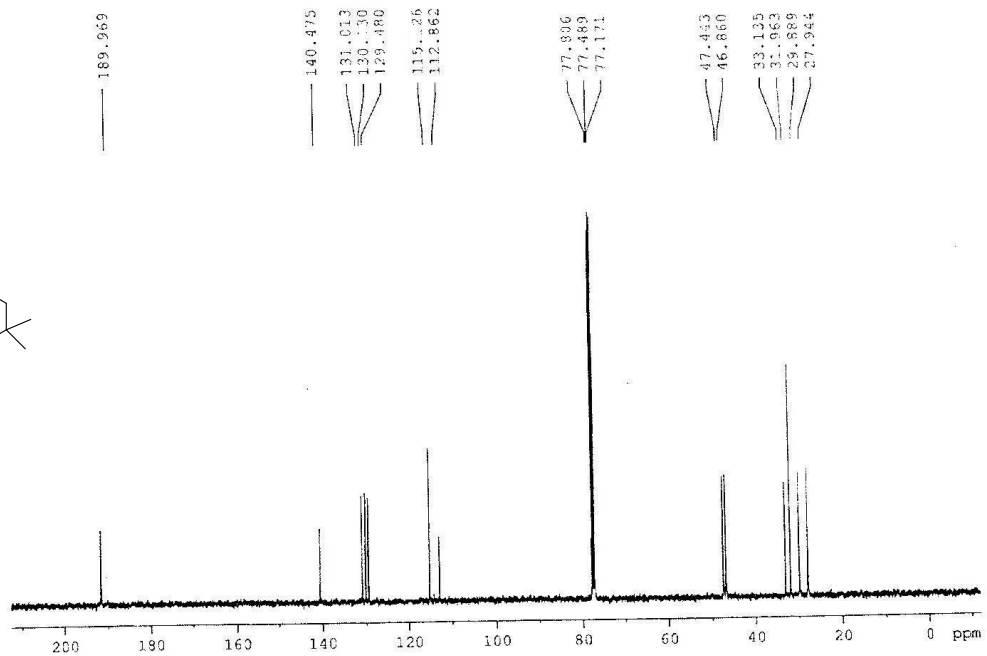

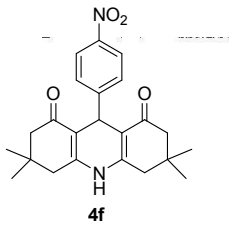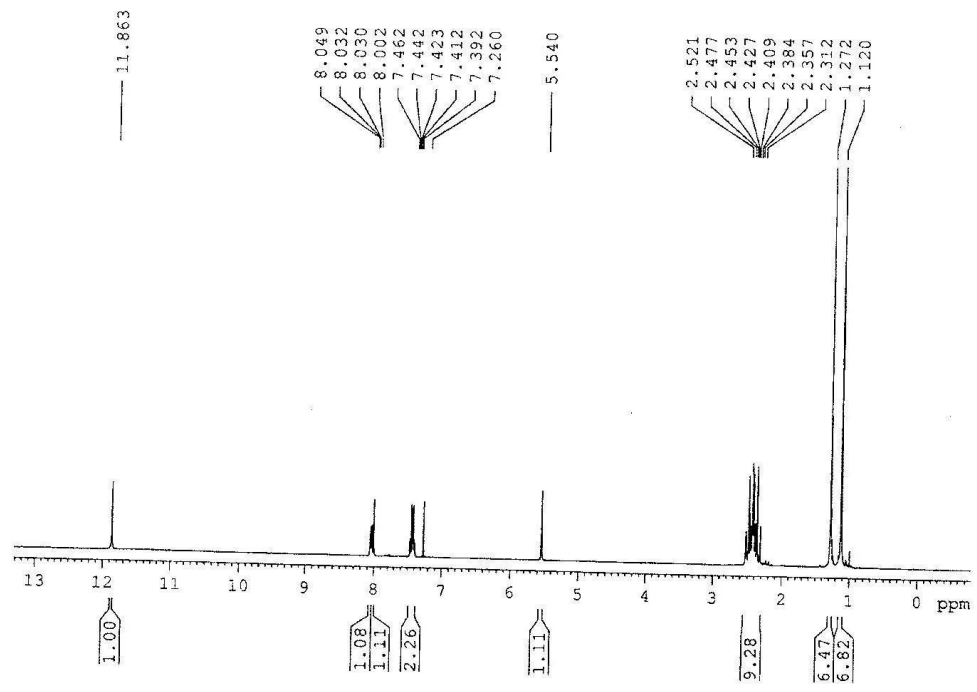

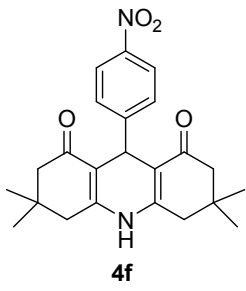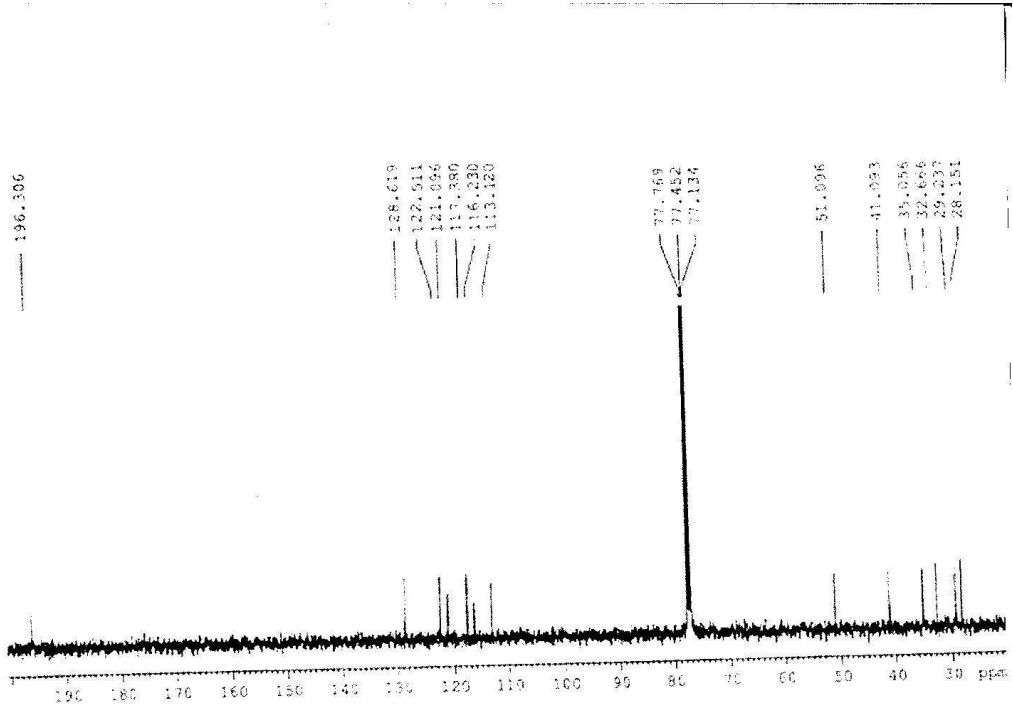

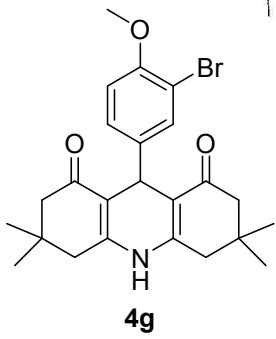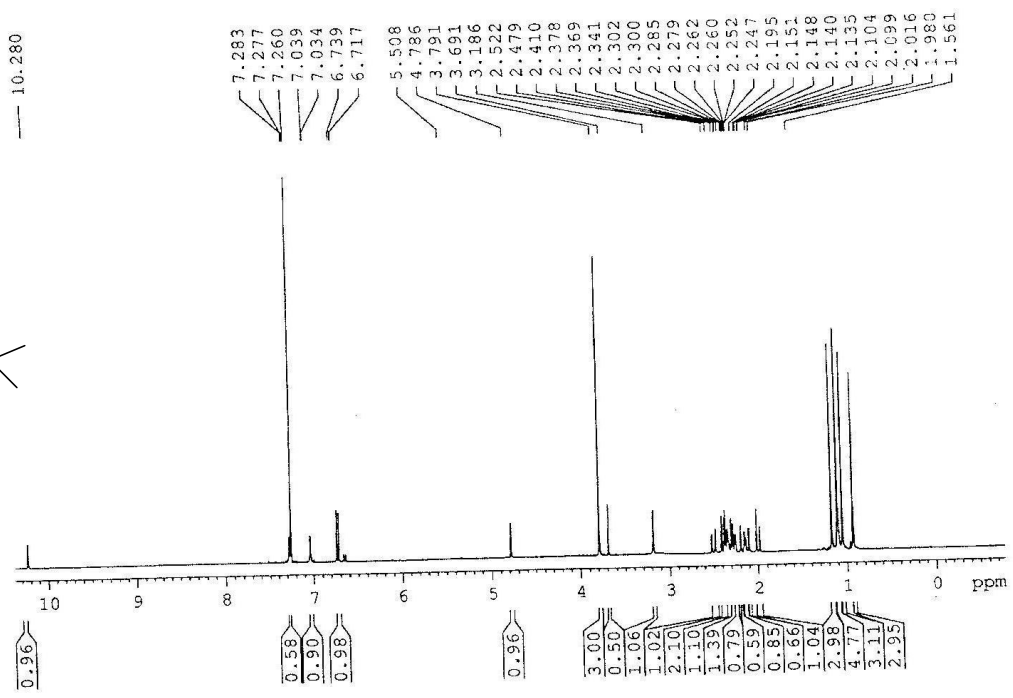

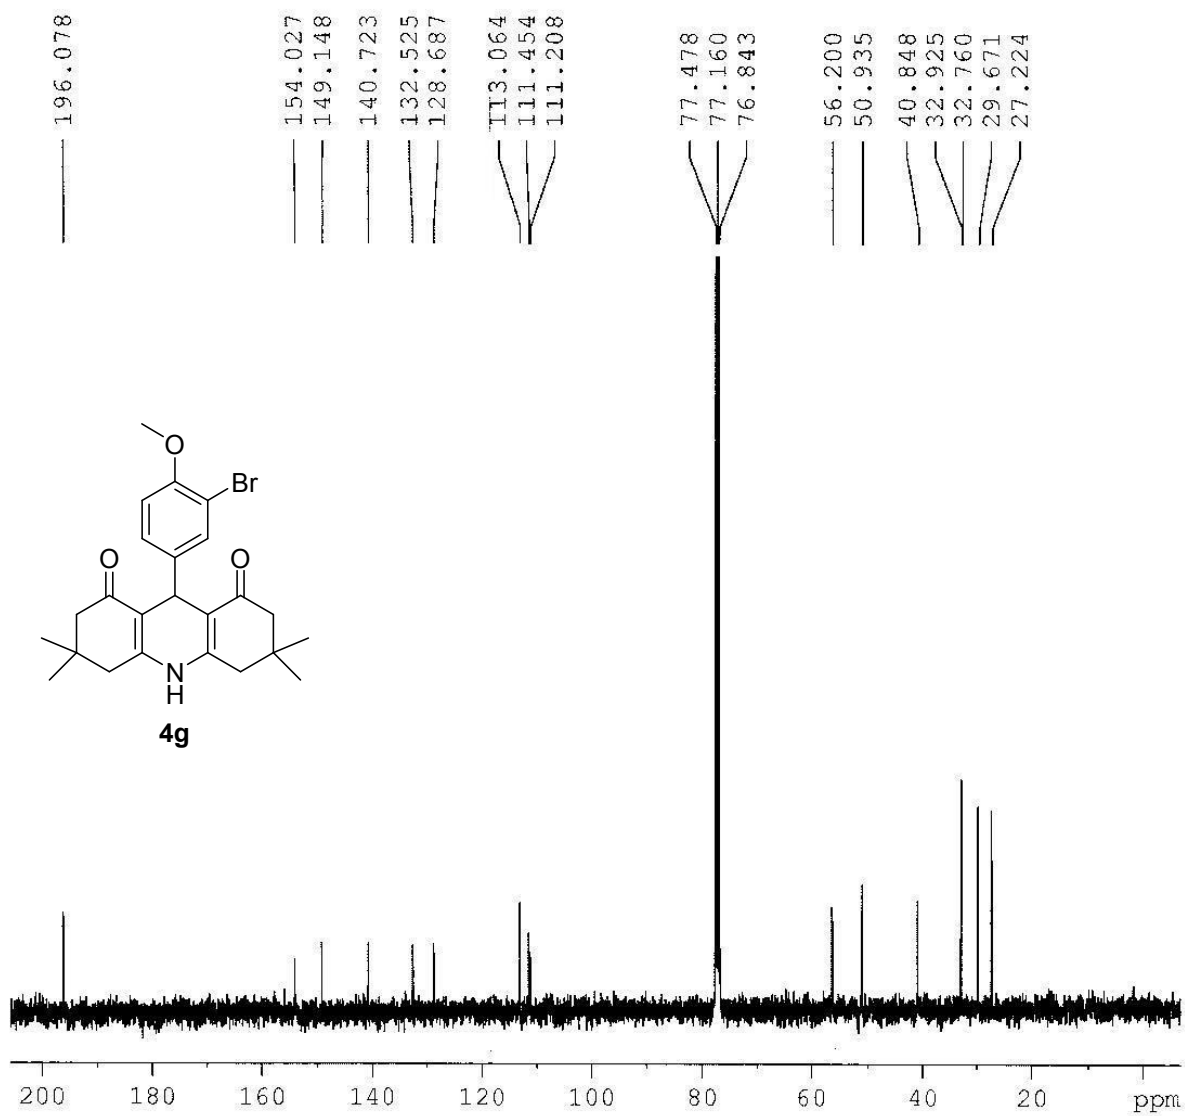



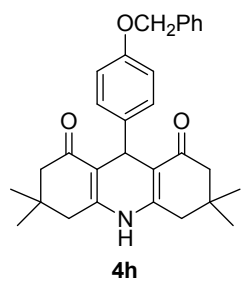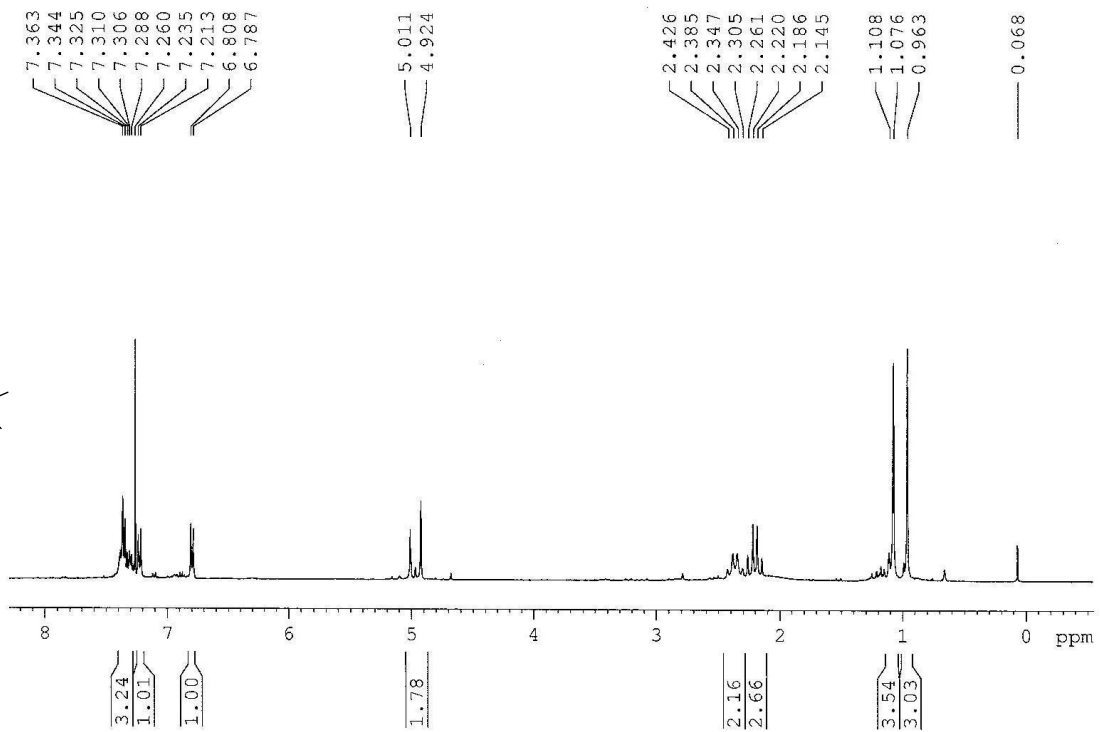

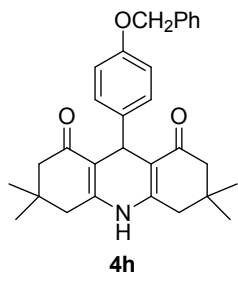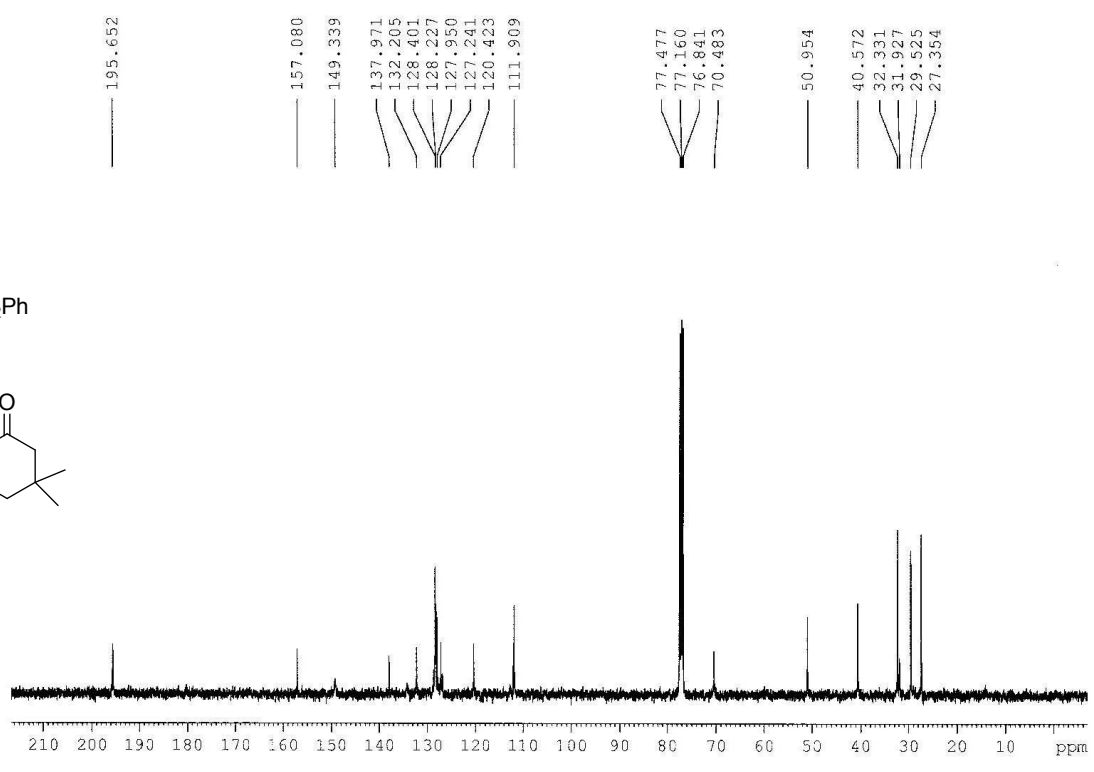

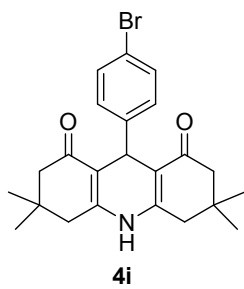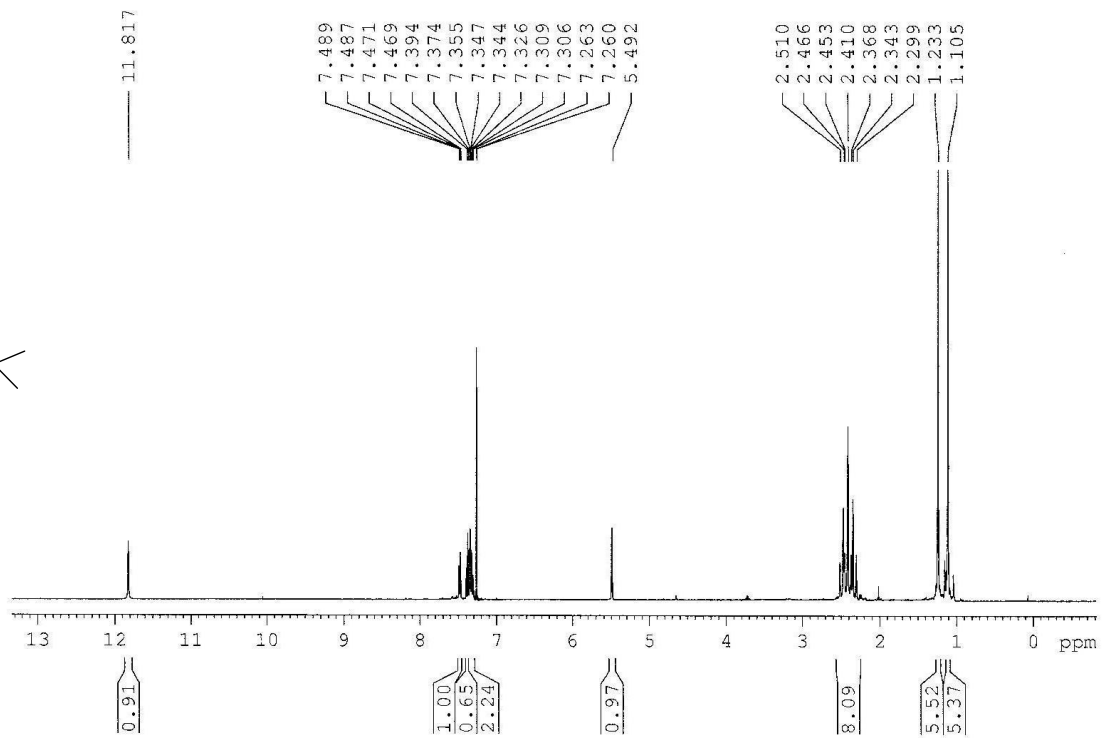

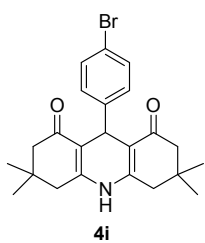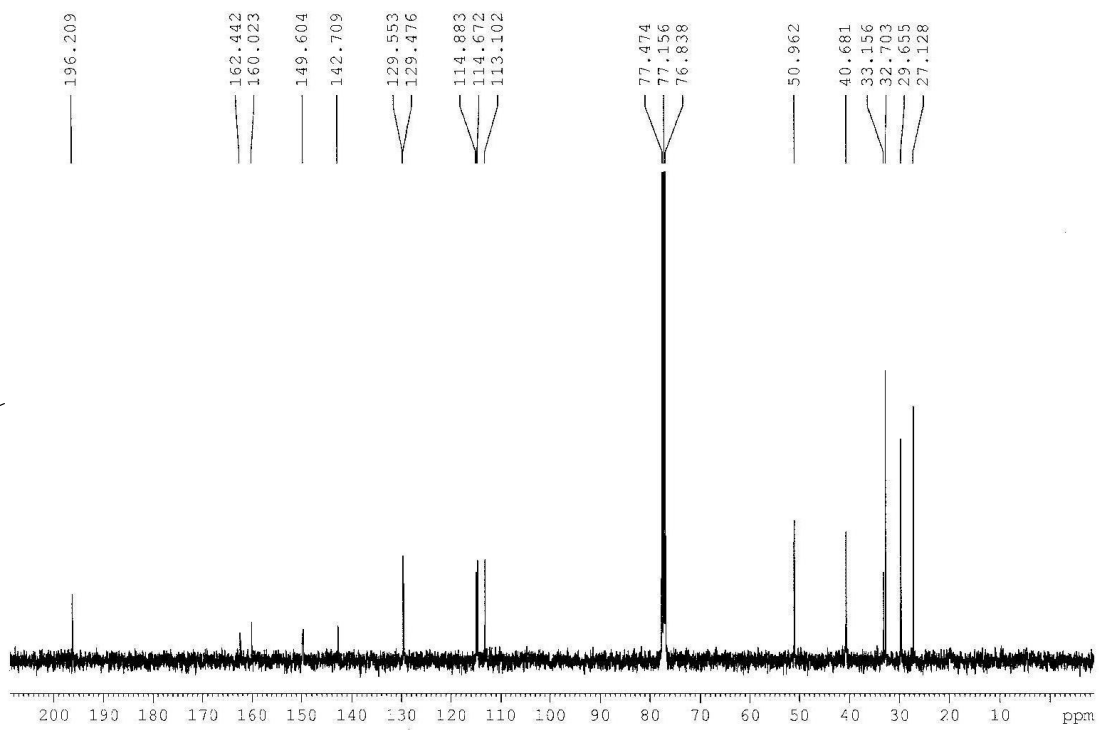

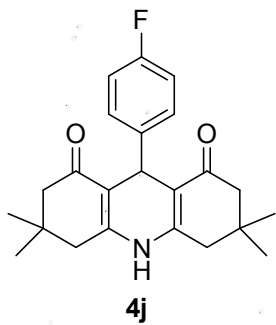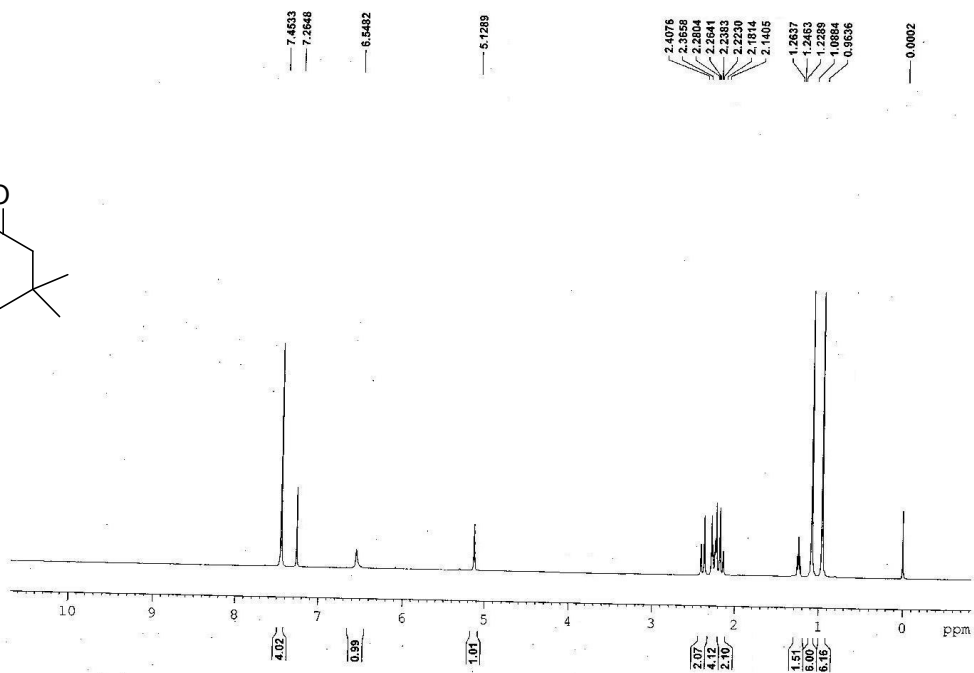

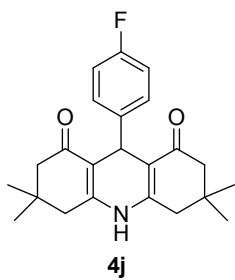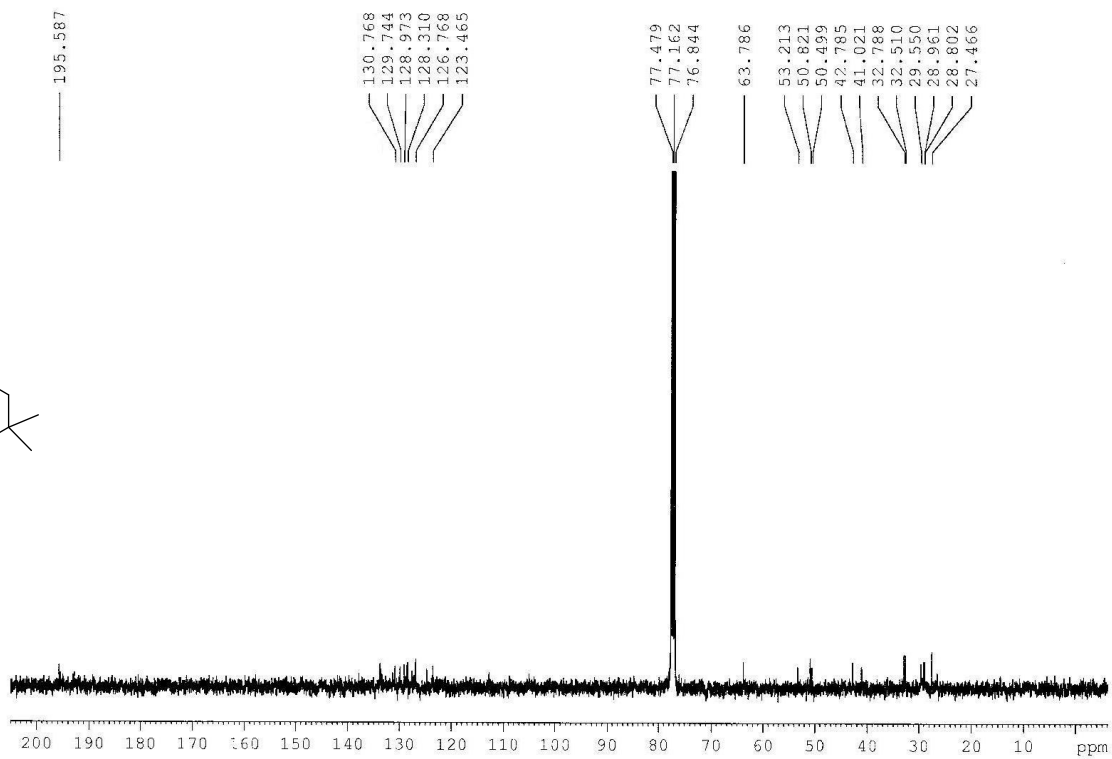

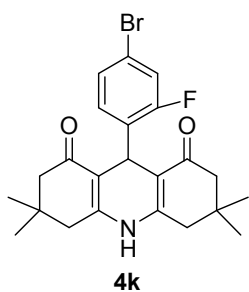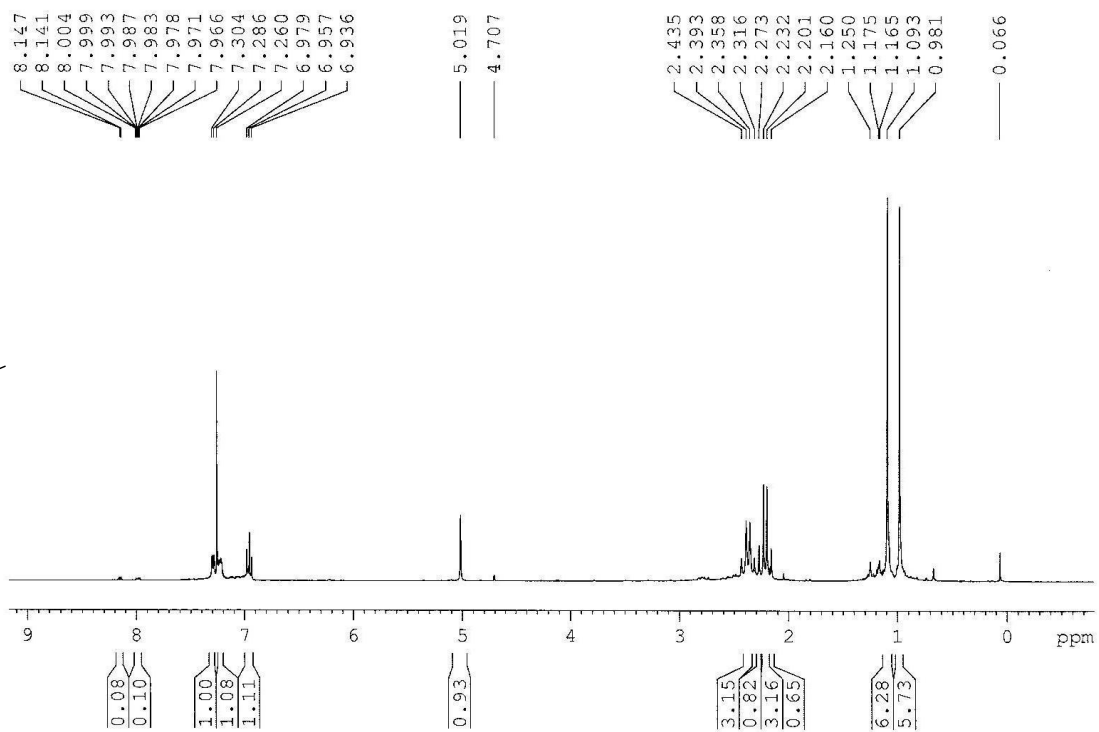

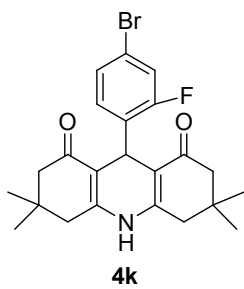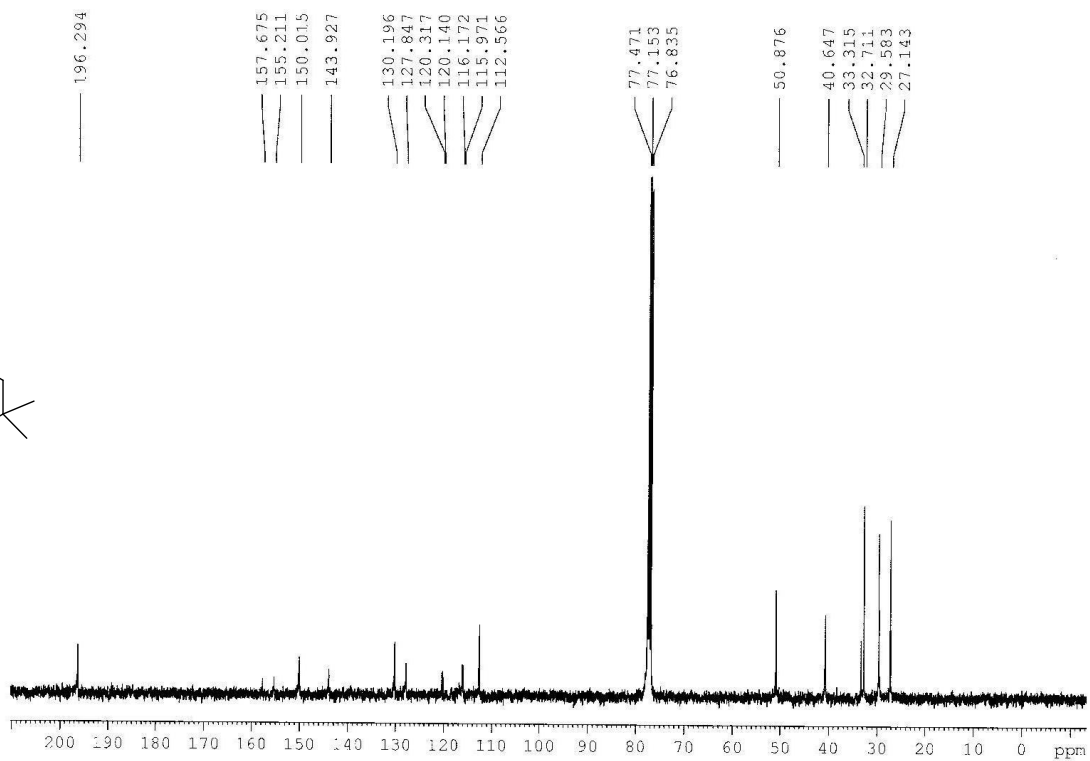



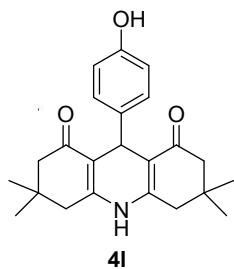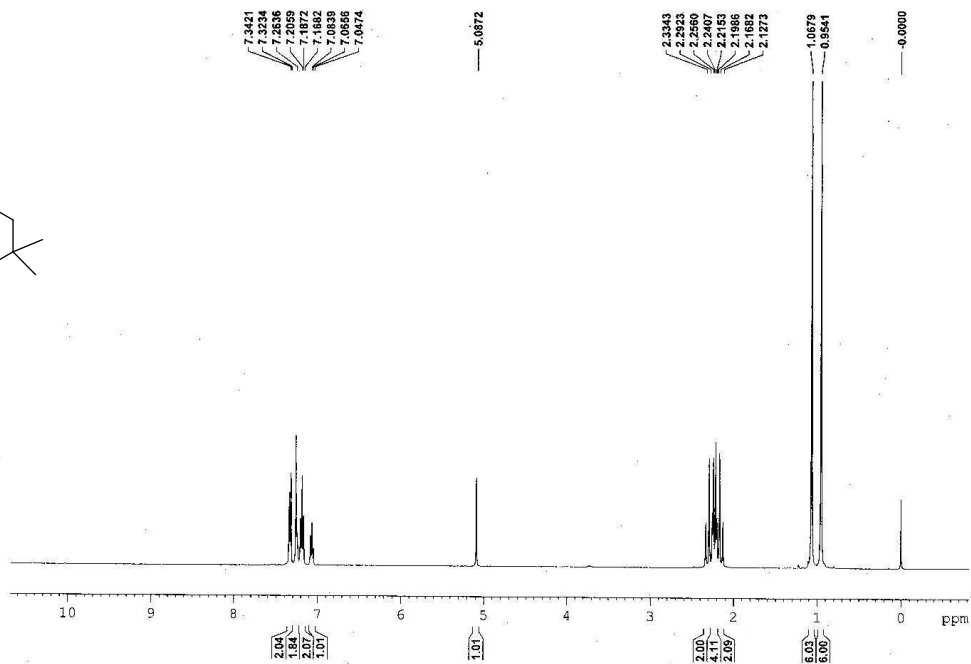

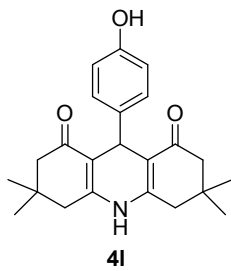

J-8

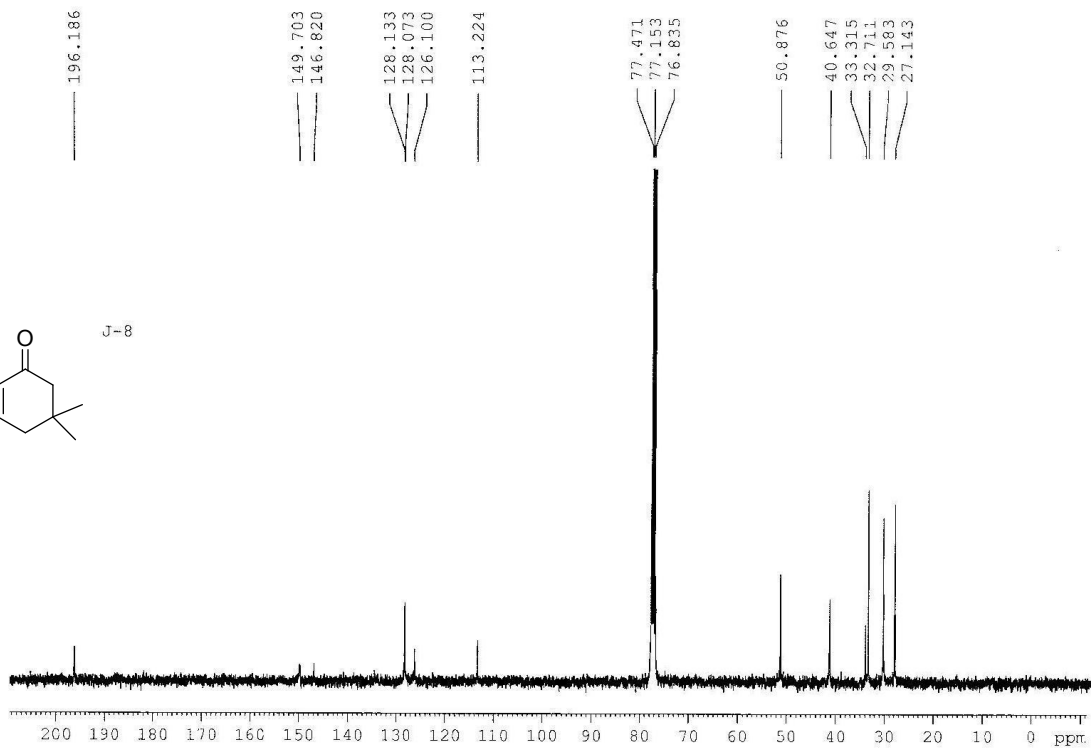

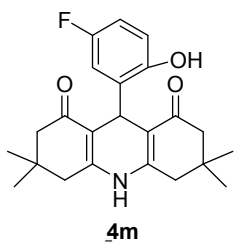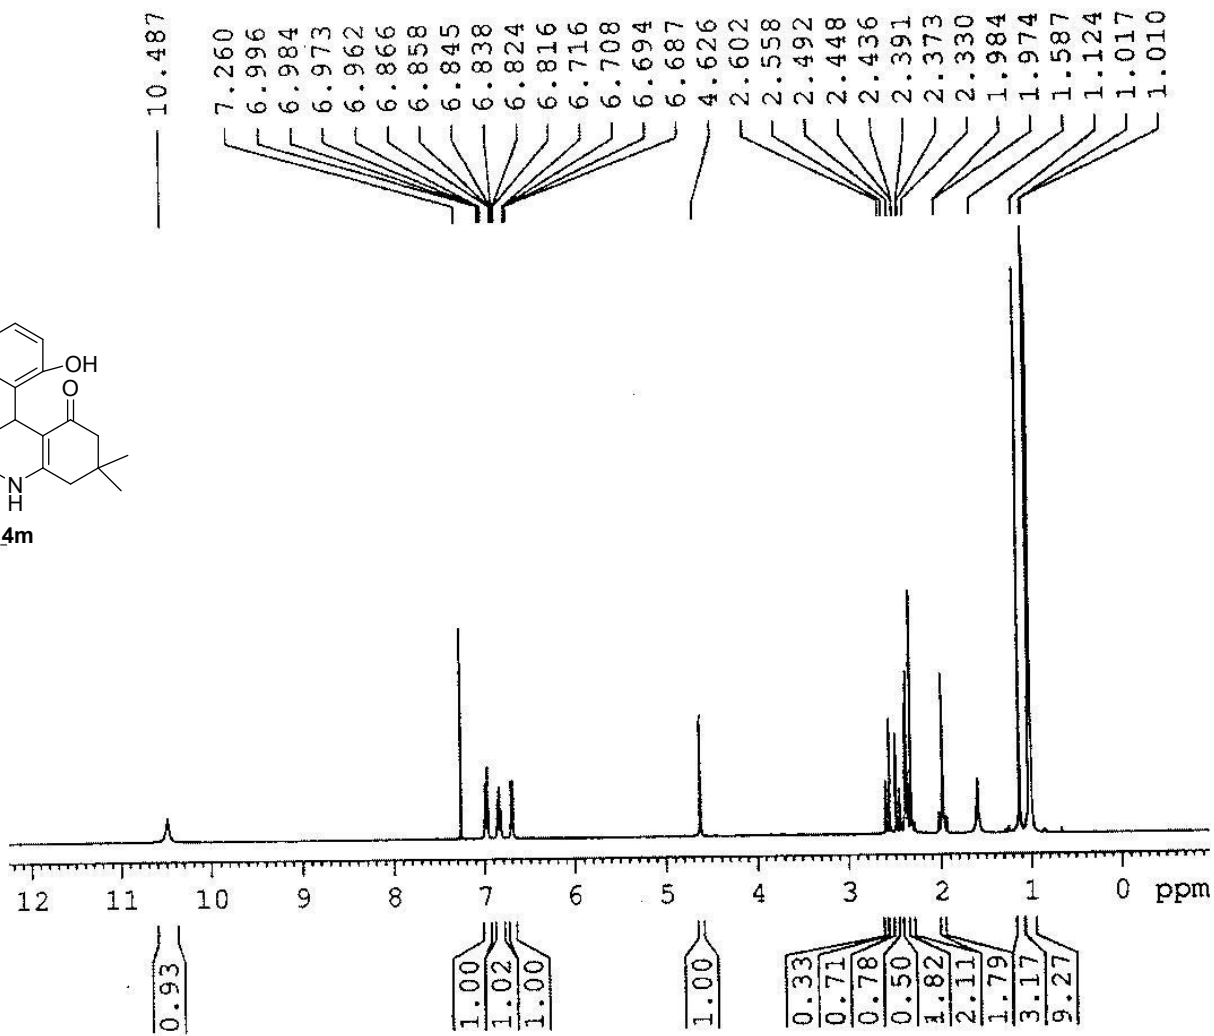

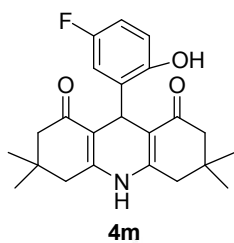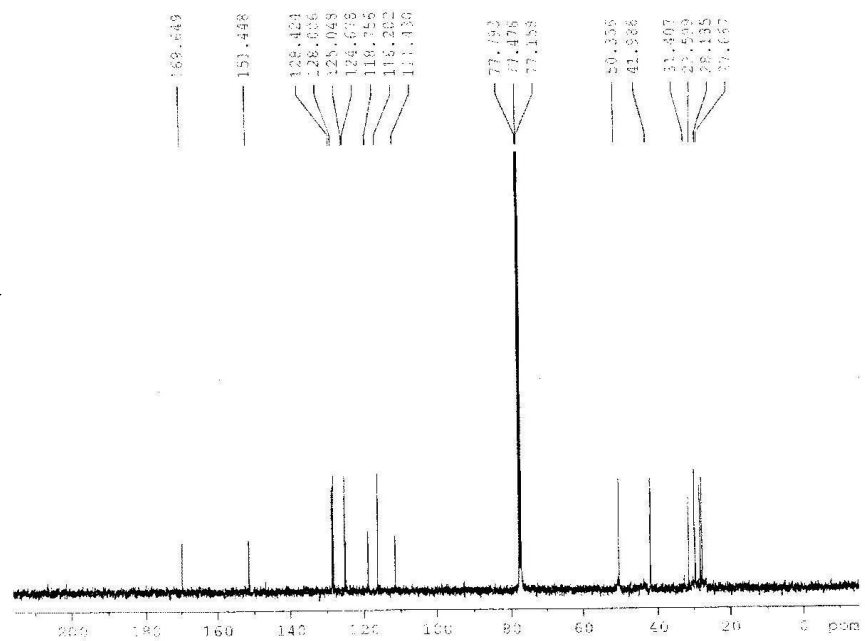

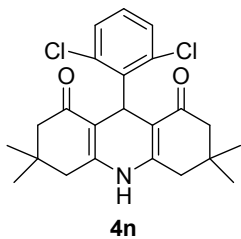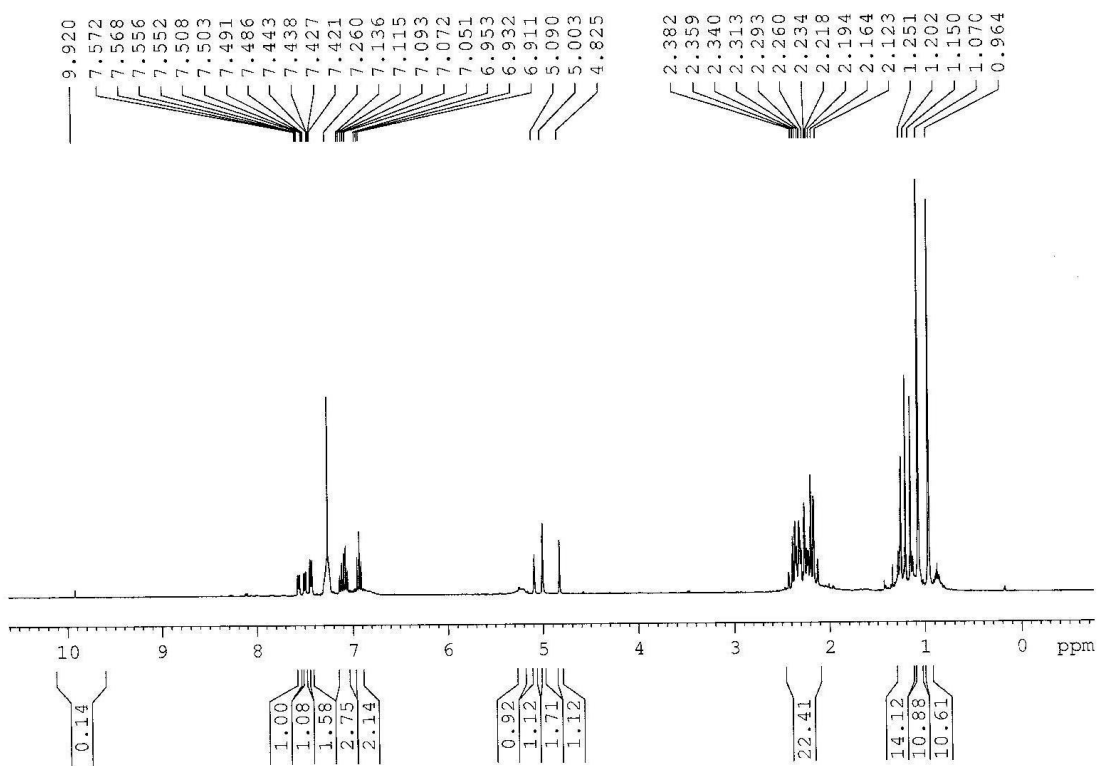

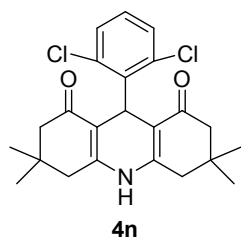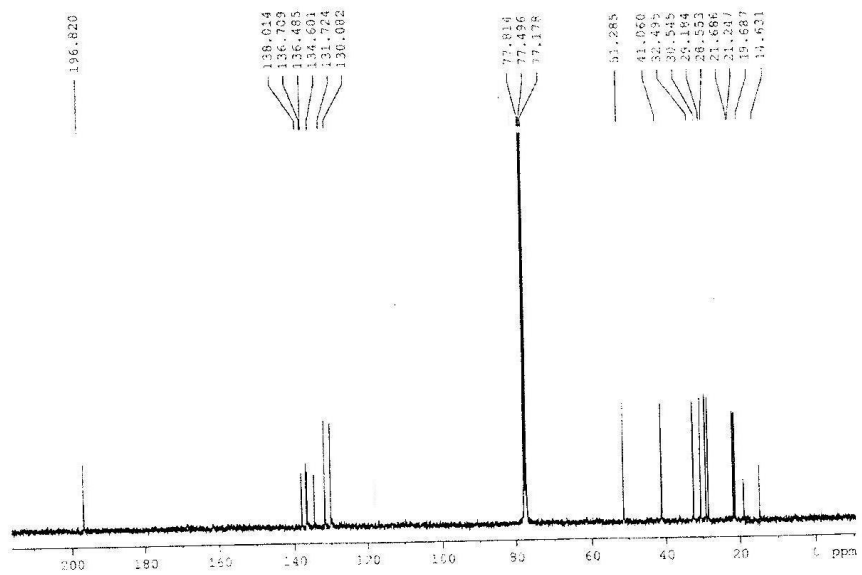

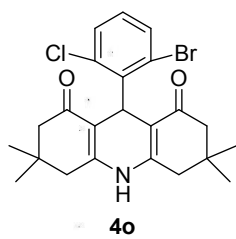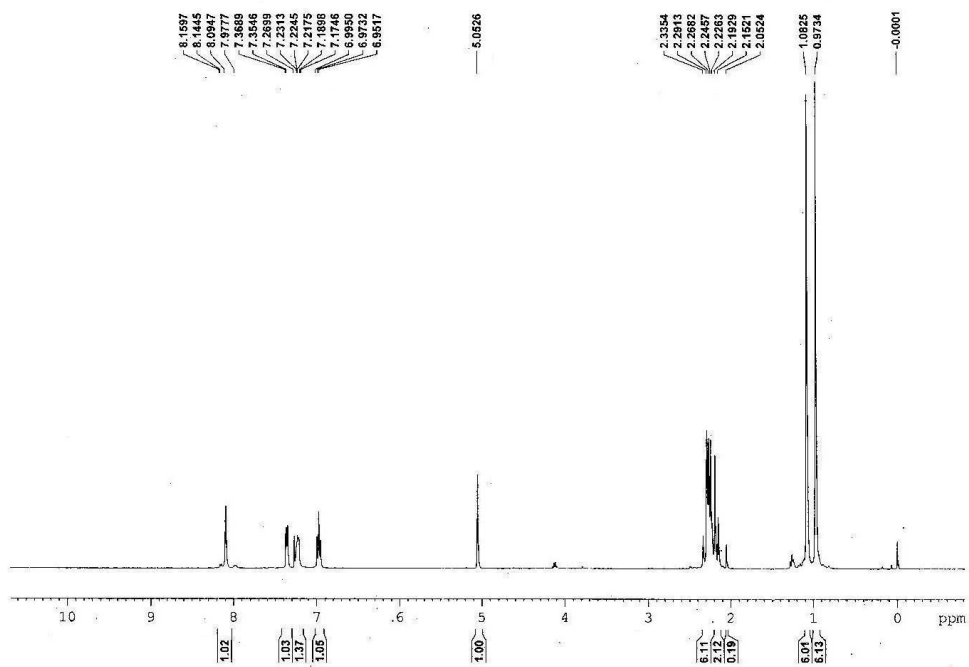

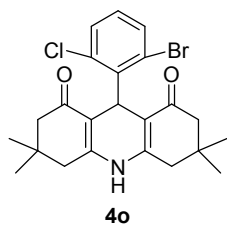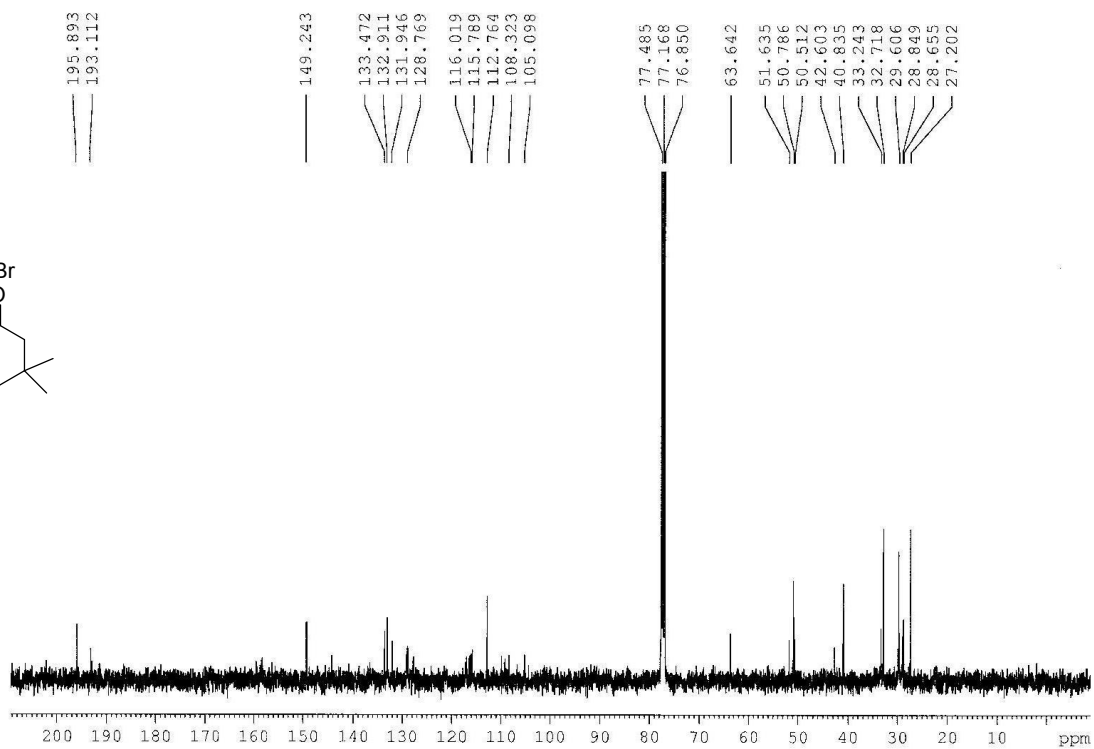

Supplement: c5ra19595k1.pdf [file c5ra19595k1.pdf]
